# Supplementary material for: Exercise decreases Neuregulin-1 concentrations in HER2+ breast cancer patients
Source: Research Square preprint supplement (doi:10.21203/rs.3.rs-7242299/v1), 2025-08-08
Supplement: Supplementary file 1 [file 2e26eb03f058d91f02993e28.docx]

| **Supplementary Table 1: Inclusion and exclusion criteria** | |
| --- | --- |
| **Inclusion criteria** | **Exclusion criteria** | |
| - Patients aged 18 to 85 years - First HER2 positive breast cancer, confirmed histologically - WHO Performance status ≤1 - Completed chemo-radiotherapy - Normal renal function (creatinine clearance ≥ 60 ml.min-1) - Normal heart function with LVEF ≥ 50% (As assessed by echocardiography dating from less than 3 months previously) - Normal liver function (normal ASAT and ALAT) - Certificate of non-contraindication to the practice of physical activity - Active contraception or menopaused | - HER2 negative Breast cancer - Patients with metastases - Heart failure (LVEF ≤ 50%) - Resting oxygen saturation (SaO2) ≤ 92% - Autoimmune disease (systemic lupus erythematosus, rheumatoid arthritis) - Symptomatic osteoarthritis, cardiovascular disease (angina or uncontrolled hypertension) or lung disease (chronic obstructive pulmonary disease) - Patients suffering from malnutrition (body mass index <18 kg.m-2) or weight loss of >10% during the previous 3 months - Patients with psychiatric or cognitive disorders deemed unsuitable for physical activity - Pregnant or breastfeeding patients | |
